# Supplementary material for: Food-burying behavior in red imported fire ants (Hymenoptera: Formicidae)
Source: PeerJ. 2019 Jan 25;7:e6349. doi: 10.7717/peerj.6349 (PMC6348953; doi:10.7717/peerj.6349)
Supplement: Supplemental Information 1 — Raw data for Figures 3–6. [file peerj-07-6349-s001.xlsx]

## Sheet: Fig. 3a,c
Percentage of replicates that showed active food-transport behaviors and food-burying behaviors (Fig 3a,c).
Observation	Colony	Starved								Fed									Colony	Starved								Fed
		Real food				False food				Real food				False food						Real food				False food				Real food				False food
		1	2	3	4	1	2	3	4	1	2	3	4	1	2	3	4	Food-transport		1	2	3	4	1	2	3	4	1	2	3	4	1	2	3	4
Food-burying	1									+	+		+						1	+	+	+	+
	2									+	+	+	+						2	+	+	+	+
	3			+						+		+							3	+	+
	4										+		+						4	+	+	+	+					+
	5									+	+	+	+						5	+	+	+	+
	6																		6	+	+	+	+
	7																		7	+		+	+
	8																		8	+	+	+	+
		1				0				15				0						29				0				1				0
	Total	32				32				32				32					Total	32				32				32				32
	Percentage	3.125				0				46.875				0					Percentage	90.625				0				3.125				0

## Sheet: Fig. 3b
Number of foraging ants on and adjacent to the food (Fig. 3b).
Colony	Replicate	Starved		Fed
		Real food	False food	Real food	False food
1	1	45	4	5	0
	2	27	1	3	0
	3	21	0	3	0
	4	39	8	0	0
2	1	64	2	10	13
	2	80	13	14	2
	3	75	17	21	3
	4	63	11	25	2
3	1	19	0	0	0
	2	21	0	1	0
	3	9	1	0	0
	4	14	0	1	0
4	1	68	2	16	1
	2	76	8	14	0
	3	65	12	17	0
	4	65	5	34	1
5	1	63	3	17	1
	2	65	6	17	0
	3	69	18	7	0
	4	76	14	11	2
6	1	30	0	9	1
	2	38	0	7	0
	3	36	2	4	0
	4	46	0	2	0
7	1	42	2	3	1
	2	24	0	2	0
	3	41	0	1	0
	4	37	1	4	0
8	1	33	1	0	0
	2	36	0	3	0
	3	25	0	5	0
	4	32	0	13	0
	Mean	45.125	4.09375	8.40625	0.84375
	S.E.	3.68704	0.97381	1.48029	0.416662

## Sheet: Fig. 3d
Weight of soil particles relocated on the food (real or false) and graph paper (Fig. 3d)
Colony	Replicate	Weight of soil particles (mg)
		False food		Real food
		Starved	Fed	Starved	Fed
1	1	0	0	0	122.5
	2	0	0	0	110.6
	3	0	3	0	0
	4	0	0	65.8	201.9
2	1	0	17.5	0	352.6
	2	0	0	0	150.3
	3	0	0	3	232
	4	0	8.8	0	181.4
3	1	0	0	0	42.8
	2	0	0	5.9	2.6
	3	5	0	133.6	35.5
	4	2.3	0	204.2	36.6
4	1	0	0	0	56.2
	2	0	0	0	110.2
	3	0	0.5	0	0.9
	4	0	8.2	0	120.8
5	1	0	1.5	0	263.7
	2	0	0	0	97.8
	3	1.8	0	0	103.5
	4	0	0	0	204.8
6	1	0	0	0	1.5
	2	0	0	0	0
	3	0	0	5.9	0
	4	0	1.1	0	0
7	1	0	0	0	0
	2	0	0	0	0.8
	3	0	0	0	1
	4	0	0	0	0
8	1	0	0	0	0
	2	0	0	0	0
	3	0	0	0	0
	4	0	0	0	0
	Mean	0.284375	1.26875	13.075	75.9375
	S.E.	0.176612	0.644556	7.67828	16.8968

## Sheet: Fig. 4b
	At each time interval, percentage of particles on, adjacent to, or around the food (Fig. 4b)
Video	Location	15 min	30 min	45 min	60 min	75 min	90 min	105 min	120 min
1	Around food			54.5455	67.6471	68.5714	69.4444	69.4444	70
2	Around food	7.14286	7.69231	4.7619	5.08475	10	22.0779	26.6667	34.4538
3	Around food	6.25	3.50877	20.2532	33.3333	48.9796	61.5385	64.5833	64.2857
4	Around food				20	54.1667	42.8571	52.2727	45.2381
5	Around food	0	14.2857	9.7561	13.9535	27.4194	46.6667	61.6071	60.1626
6	Around food	33.3333	76.9231	73.3333	71.4286	73.3333	72.2222	66.6667	59.2593
7	Around food	22.7273	24.4898	16.9492	18.3333	29.6875	41.4286	47.8261	47.0588
8	Around food	0	16.6667	17.8571	17.8571	14.7059	11.5385	22.093	28.5714
9	Around food							75	87.5
10	Around food		30	22.2222	22.2222	29.6296	30.7692	36.6667	40
	Mean	11.5756	24.7952	27.4598	29.9844	39.6104	44.2826	52.2827	53.653
	S.E.	5.51893	9.3435	8.39715	7.8767	7.56395	6.94743	5.85669	5.6746
1	Adjacent to food			45.4545	32.3529	31.4286	27.7778	27.7778	30
2	Adjacent to food	85.7	76.9231	61.9048	52.5424	48.3333	37.6623	27.619	27.7311
3	Adjacent to food	68.8	50.8772	35.443	26.6667	20.4082	15.3846	13.5417	13.2653
4	Adjacent to food				60	29.1667	25.7143	18.1818	19.0476
5	Adjacent to food	100	78.5714	53.6585	53.4884	37.0968	25.5556	17.8571	13.0081
6	Adjacent to food	66.6667	23.0769	26.6667	21.4286	26.6667	27.7778	33.3333	37.037
7	Adjacent to food	68.1818	55.102	50.8475	50	43.75	34.2857	28.9855	32.3529
8	Adjacent to food	100	62.5	53.5714	53.5714	47.0588	38.4615	31.3953	29.6703
9	Adjacent to food							25	12.5
10	Adjacent to food		70	72.2222	66.6667	55.5556	50	36.6667	34.2857
	Mean	81.5581	59.5787	49.9711	46.3019	37.7183	31.4022	26.0358	24.8898
	S.E.	6.48283	7.24869	5.06989	5.21519	3.88968	3.31786	2.34518	3.00466
1	On food			0	0	0	2.77778	2.77778	0
2	On food	7.14286	15.3846	33.3333	42.3729	41.6667	40.2597	45.7143	37.8151
3	On food	25	45.614	44.3038	40	30.6122	23.0769	21.875	22.449
4	On food				20	16.6667	31.4286	29.5455	35.7143
5	On food	0	7.14286	36.5854	32.5581	35.4839	27.7778	20.5357	26.8293
6	On food	0	0	0	7.14286	0	0	0	3.7037
7	On food	9.09091	20.4082	32.2034	31.6667	26.5625	24.2857	23.1884	20.5882
8	On food	0	20.8333	28.5714	28.5714	38.2353	50	46.5116	41.7582
9	On food							0	0
10	On food		0	5.55556	11.1111	14.8148	19.2308	26.6667	25.7143
	Mean	6.87229	15.6261	22.5691	23.7137	22.6713	24.3153	21.6815	21.4572
	S.E.	3.98035	5.9953	6.29875	4.98335	5.23235	5.34764	5.35615	4.90771

## Sheet: Fig. 4c
The size distribution of particles that were adjacent to , on , or around the food (Fig. 4c).
	Size (mm2)
	Adjacent to food		On food		Around food
	2.66		3.515		0.86
	2.894		3.097		2.182
	1.272		0.605		2.165
	1.171		1.798		3.529
	0.903		1.184		1.413
	1.146		1.646		1.066
	1.305		0.81		3.471
	1.322		1.531		3.694
	0.719		0.552		3.231
	2.075		1.451		2.752
	0.736		2.697		4.562
	1.062		0.961		1.149
	0.293		0.445		5.14
	1.798		0.73		4.264
	1.709		1.282		2.488
	3.604		2.305		4.174
	2.572		1.735		3.43
	0.4		2.038		2.62
	0.899		1.798		4.851
	0.837		1.682		1.339
	2.59		0.525		1.909
	1.299		1.602		2.298
	1.299		0.908		1.339
	1.095		1.362		1.595
	1.21		1.415		2.727
	1.264		0.463		2.041
	1.344		0.329		0.777
	0.988		1.059		4.196
	0.828		1.326		3.372
	1.201		0.667		2.669
	0.57		0.997		2.111
	1.335		2.065		3.304
	0.632		0.997		2.231
	0.472		2.189		1.013
	0.709		1.985		0.704
	0.465		1.308		1.862
	1.076		2.083		0.781
	1.003		0.578		0.661
	0.342		0.712		0.764
	0.242		0.222		2.737
	3.367		0.472		1.356
	1.851		1.204		2.171
	4.419		0.463		1.836
	2.626		0.614		3.235
	4.402		0.303		1.888
	1.24		2.456		3.741
	2.938		0.872		2.351
	3.03		2.41		4.994
	0.62		1.63		4.042
	0.712		2.456		0.875
	1.814		2.227		0.884
	2.342		1.446		0.85
	2.663		2.135		3.347
	4.683		1.515		2.643
	2.525		0.735		1.356
	3.053		1.033		1.073
	0.551		0.505		0.378
	0.505		0.712		0.824
	0.605		2.961		0.326
	2.554		1.814		2.128
	0.961		1.676		3.801
	0.694		1.768		1.15
	3.498		0.551		0.326
	0.792		0.338		3.201
	0.934		1.201		3.012
	0.534		1.282		0.721
	0.689		1.317		0.85
	1.098		1.486		1.219
	1.787		2.376		3.627
	1.451		1.023		1.492
	3.184		1.922		1.446
	4.063		0.765		0.918
	1.206		0.961		0.735
	0.499		1.86		1.286
	1.333		0.418		0.918
	2.467		0.409		1.837
	0.209		0.599		3.719
	1.351		0.644		3.122
	0.689		1.914		1.24
	0.989		0.925		1.538
	0.29		0.299		0.781
	0.762		1.261		1.056
	0.383		0.58		6.818
	0.781		1.061		3.604
	0.901		0.753		3.903
	1.076		0.608		1.4
	0.773		1.261		1.446
	2.001		0.209		1.561
	0.733		1.506		3.811
	0.598		0.789		2.319
	2.017		1.234		1.01
	2.826		1.297		0.941
	1.471		1.587		1.745
	1.182		0.844		0.781
	1.817		1.152		2.709
	0.471		0.726		2.479
	0.288		0.961		2.571
	0.884		2.367		2.686
	0.779		0.78		1.745
	1.884		1.878		2.135
	1.634		1.17		1.286
	1.672		1.197		1.63
	0.913		2.249		1.423
	1.355		1.533		3.994
	0.49		0.834		1.974
	2.259		1.125		3.237
	1.182		0.207		3.535
	0.538		1.442		2.801
	0.413		1.23		1.354
	2.773		0.308		1.331
	1.2		0.702		1.584
	0.714		1.336		0.918
	4.175		0.913		0.781
	0.879		0.25		0.551
	3.027		1.086		1.676
	6.689		1.028		1.469
	2.686		0.298		1.423
	2.051		1.451		0.666
	2.002		3.297		1.607
	1.636		0.674		2.548
	1.27		1.392		1.699
	1.782		2.563		1.561
	4.517		0.537		0.781
	4.419		0.293		0.781
	1.074		0.317		2.697
	1.587		0.537		0.89
	2.71		2.71		1.851
	1.392		1.733		0.819
	0.709		0.806		0.338
	0.465		1.343		0.828
	1.076		1.196		0.267
	1.003		2.539		2.394
	0.342		1.196		2.723
	0.242		2.026		0.525
	0.108		1.294		1.121
	0.086		1.074		1.7
	0.773		1.05		0.418
	0.922		2.979		0.231
	1.29		0.171		0.623
	1.182		0.22		1.415
	0.484		0.171		0.516
	0.914		0.978		1.157
	1.075		0.416		1.166
	0.86		0.367		0.961
	0.43		0.292		1.116
	0.322		0.367		0.698
	1.129		0.305		0.88
	1.263		0.283		0.354
Mean	1.4723		0.225		1.524
S.E.	0.0923525		0.266		1.361
			0.215		3.057
			0.209		0.862
			0.322		1.37
			0.188		0.989
			0.236		1.179
			0.298		0.898
			0.43		2.24
			0.672		2.186
			1.317		4.381
			1.236		2.014
			0.403		2.83
			0.269		1.923
			1.209		1.633
			0.537		2.104
			0.322		1.306
		Mean	1.1336		0.989
		S.E.	0.0578319		2.494
					0.735
					1.034
					1.361
					2.449
					1.678
					1.796
					0.907
					2.776
					0.989
					0.898
					0.435
					1.914
					1.215
					2.349
					1.923
					1.959
					1.451
					2.059
					4.499
					1.896
					5.125
					0.626
					0.472
					0.925
					2.73
					2.077
					2.277
					4.499
					1.243
					0.59
					1.669
					2.83
					1.07
					3.574
					0.871
					1.034
					2.34
					0.599
					0.816
					3.125
					3.978
					5.142
					2.16
					1.068
					1.539
					2.336
					1.1
					0.989
					1.068
					0.478
					0.383
					1.65
					0.582
					0.765
					1.012
					6.286
					3.979
					3.941
					1.778
					0.308
					0.538
					1.048
					1.557
					1.298
					2.326
					4.835
					0.384
					1.125
					1.173
					4.393
					5.729
					0.952
					2.153
					0.74
					4.008
					0.759
					0.404
					0.846
					0.74
					1.173
					3.518
					3.316
					0.846
					0.711
					0.394
					4.004
					3.711
					1.904
					9.375
					2.051
					3.76
					3.003
					4.81
					2.002
					3.638
					1.147
					1.392
					0.806
					0.61
					2.979
					3.418
					0.562
					0.391
					1.416
					1.514
					0.757
					1.247
					1.052
					0.538
					0.66
					0.66
					5.172
					6.629
					5.202
					4.102
					9.156
					0.862
					2.675
					1.546
					1.724
					2.259
					1.219
					1.249
					0.624
					1.992
					0.591
					1.666
					1.666
					2.096
					1.075
					1.129
					2.768
					1.854
					1.612
					0.296
					0.215
					1.451
					2.284
					0.645
					0.484
				Mean	1.95778
				S.E.	0.0813419

## Sheet: Fig. 5a
	At each time interval, number of Solenopsis invicta workers that exhibited wandering, foraging and food-burying activities (Fig. 5a).
Video	Observation time Pattern	0 min	5 min	10 min	15 min	20 min	25 min	30 min	35 min	40 min	45 min	50 min	55 min	60 min	65 min	70 min	75 min	80 min	85 min	90 min	95 min	100 min	105 min	110 min	115 min	120 min
1	Wandering	53	30	30	29	14	25	31	23	21	17	36	33	20	23	26	31	25	26	36	20	28	23	22	15	27
2	Wandering	36	25	22	33	27	22	34	16	10	12	16	16	17	16	16	17	18	18	13	26	25	12	21	14	11
3	Wandering	30	20	21	18	14	12	19	20	20	17	18	16	22	15	18	30	11	18	17	23	12	16	14	17	21
4	Wandering	24	26	16	18	18	22	17	34	23	21	24	35	21	17	13	28	24	18	24	23	33	25	18	20	21
5	Wandering	24	6	28	22	20	22	35	30	25	35	21	18	20	12	28	13	18	16	25	24	16	26	28	27	19
6	Wandering	42	17	21	31	42	31	33	38	28	32	48	32	40	35	35	29	28	38	46	42	26	35	36	35	35
7	Wandering	22	22	21	19	27	18	18	15	13	11	25	20	22	12	14	21	21	19	23	19	30	22	15	18	15
8	Wandering	33	29	18	20	28	21	28	12	21	23	16	16	19	19	42	24	31	24	32	30	23	23	30	28	20
9	Wandering	31	29	25	17	15	22	26	23	22	32	18	15	27	17	18	28	21	24	26	29	20	21	23	11	25
10	Wandering	57	19	23	23	31	25	24	21	34	32	32	18	32	23	37	35	40	44	40	42	40	34	34	33	40
	Mean	35.2	22.3	22.5	23	23.6	22	26.5	23.2	21.7	23.2	25.4	21.9	24	18.9	24.7	25.6	23.7	24.5	28.2	27.8	25.3	23.7	24.1	21.8	23.4
	S.E.	3.82041	2.30964	1.34371	1.8619	2.86434	1.54919	2.15639	2.67	2.1605	2.84332	3.29039	2.54493	2.24103	2.15742	3.31009	2.15097	2.53881	2.97116	3.24482	2.60683	2.5865	2.23134	2.4196	2.64491	2.77369
1	Foraging	3	3	4	1	8	4	5	5	8	6	7	9	11	11	13	8	12	10	11	13	10	10	13	12	9
2	Foraging	2	2	0	1	2	3	3	3	5	3	4	5	4	5	6	4	4	4	6	6	4	6	5	9	8
3	Foraging	1	3	3	1	2	4	3	3	4	0	6	6	7	10	7	7	7	8	8	7	9	8	9	13	11
4	Foraging	5	5	3	5	5	5	6	5	1	7	3	8	4	8	5	6	5	9	6	6	6	6	12	5	12
5	Foraging	2	2	2	4	6	5	4	2	2	4	5	4	3	7	2	7	6	6	8	9	7	11	8	10	10
6	Foraging	3	4	5	3	5	8	6	6	9	7	5	11	8	15	16	19	20	24	18	20	19	28	25	19	16
7	Foraging	1	3	2	2	4	2	4	3	2	3	7	7	9	7	6	6	7	9	8	7	7	9	10	11	8
8	Foraging	1	5	3	3	3	4	6	6	5	3	5	4	7	7	11	8	10	12	10	14	14	10	13	17	16
9	Foraging	8	7	5	4	6	8	8	4	6	7	8	7	7	6	7	16	11	12	12	14	8	8	8	9	9
10	Foraging	5	5	7	5	6	6	7	10	8	10	10	8	12	10	12	13	10	14	16	14	13	14	18	20	18
	Mean	3.1	3.9	3.4	2.9	4.7	4.9	5.2	4.7	5	5	6	6.9	7.2	8.6	8.5	9.4	9.2	10.8	10.3	11	9.7	11	12.1	12.5	11.7
	S.E.	0.72188	0.504425	0.618241	0.504425	0.61554	0.622718	0.533333	0.731057	0.881917	0.918937	0.649786	0.706321	0.940449	0.933333	1.36015	1.55063	1.46667	1.73718	1.28279	1.48324	1.41461	2.03306	1.82848	1.52206	1.16476
1	Transporting	0	0	0	0	0	0	0	1	1	1	0	1	0	0	0	1	0	0	0	0	0	0	1	2	1
2	Transporting	0	1	1	1	1	1	1	1	1	1	2	1	0	1	1	3	2	2	1	1	1	2	0	0	0
3	Transporting	0	2	2	3	3	2	2	1	1	2	1	1	2	2	2	2	2	0	0	0	0	0	0	1	0
4	Transporting	0	0	0	0	0	0	0	0	0	0	0	1	0	0	0	1	1	0	0	0	0	0	0	0	0
5	Transporting	0	0	0	1	0	0	0	3	2	0	1	0	1	2	2	2	0	1	0	0	1	1	1	0	3
6	Transporting	0	0	2	0	0	0	1	0	0	0	0	0	0	0	0	0	0	1	0	0	2	1	0	0	2
7	Transporting	0	1	2	1	1	2	2	2	1	0	0	0	0	1	1	0	0	1	1	0	1	0	0	0	2
8	Transporting	0	1	1	1	0	1	0	1	0	0	0	0	1	0	1	0	1	1	1	2	2	1	1	0	1
9	Transporting	0	0	0	0	0	0	0	0	0	0	0	0	0	0	0	0	0	0	0	1	1	0	1	0	1
10	Transporting	0	0	0	0	0	0	0	0	0	1	0	2	0	0	1	0	0	0	2	0	0	1	0	0	0
	Mean	0	0.5	0.8	0.7	0.5	0.6	0.6	0.9	0.6	0.5	0.4	0.6	0.4	0.6	0.8	0.9	0.6	0.6	0.5	0.4	0.8	0.6	0.4	0.3	1
	S.E.	0	0.223607	0.290593	0.3	0.307318	0.266667	0.266667	0.314466	0.221108	0.223607	0.221108	0.221108	0.221108	0.266667	0.249444	0.34801	0.266667	0.221108	0.223607	0.221108	0.249444	0.221108	0.163299	0.213437	0.333333

## Sheet: Fig. 5b-e
	The percentage of large, medium and small workers that exhibited the food-burying behavior, time spent repeatedly transporting the particles by each ant, number of relocated particles for each ant, and the average time spent transporting each particle by each ant (Fig. 5b-e).
Small worker	No.	Number of particles	Time for transporting (sec)	Average time for transporting each particle (sec)		Small worker	Medium worker	Large worker
	1	14	1204	86	Number	80	34	19
	2	1	72	72	Total	133	133	133
	3	7	451	64.4286	Percentage	60.1504	25.5639	14.2857
	4	19	1328	69.8947
	5	1	39	39
	6	2	92	46
	7	27	1015	37.5926
	8	13	1081	83.1538
	9	23	915	39.7826
	10	14	797	56.9286
	11	1	15	15
	12	2	96	48
	13	2	93	46.5
	14	10	629	62.9
	15	10	505	50.5
	16	3	452	150.667
	17	2	77	38.5
	18	4	103	25.75
	19	9	491	54.5556
	20	9	120	13.3333
	21	10	645	64.5
	22	12	413	34.4167
	23	1	21	21
	24	2	63	31.5
	25	1	28	28
	26	20	805	40.25
	27	4	79	19.75
	28	8	335	41.875
	29	4	243	60.75
	30	2	63	31.5
	31	3	220	73.3333
	32	1	33	33
	33	10	448	44.8
	34	3	54	18
	35	3	41	13.6667
	36	1	8	8
	37	13	748	57.5385
	38	2	65	32.5
	39	1	28	28
	40	7	489	69.8571
	41	1	55	55
	42	1	90	90
	43	3	284	94.6667
	44	1	42	42
	45	1	8	8
	46	1	144	144
	47	1	15	15
	48	1	12	12
	49	9	808	89.7778
	50	1	77	77
	51	43	2072	48.186
	52	1	39	39
	53	1	33	33
	54	5	437	87.4
	55	26	1810	69.6154
	56	1	8	8
	57	4	342	85.5
	58	1	19	19
	59	2	263	131.5
	60	4	106	26.5
	61	6	340	56.6667
	62	1	19	19
	63	1	20	20
	64	10	728	72.8
	65	11	559	50.8182
	66	23	1073	46.6522
	67	4	259	64.75
	68	1	5	5
	69	2	41	20.5
	70	3	126	42
	71	3	134	44.6667
	72	28	2481	88.6071
	73	1	23	23
	74	1	4	4
	75	1	17	17
	76	3	252	84
	77	2	67	33.5
	78	1	4	4
	79	1	21	21
	80	1	35	35
	Mean	6.1625	340.95	47.2604
	S.E.	0.890961	54.2511	3.44798
Medium worker	No.	Number of particles	Time for transporting (sec)	Average time for transporting each particle (sec)
	1	1	69	69
	2	20	909	45.45
	3	3	223	74.3333
	4	1	11	11
	5	30	2132	71.0667
	6	37	2501	67.5946
	7	1	41	41
	8	13	826	63.5385
	9	14	1670	119.286
	10	5	336	67.2
	11	2	61	30.5
	12	3	103	34.3333
	13	1	21	21
	14	1	10	10
	15	11	602	54.7273
	16	18	1000	55.5556
	17	10	590	59
	18	56	2331	41.625
	19	1	11	11
	20	3	150	50
	21	3	44	14.6667
	22	5	246	49.2
	23	16	1058	66.125
	24	7	320	45.7143
	25	11	720	65.4545
	26	1	20	20
	27	4	127	31.75
	28	11	1149	104.455
	29	8	497	62.125
	30	3	296	98.6667
	31	1	10	10
	32	1	35	35
	33	2	92	46
	34	1	33	33
	Mean	8.97059	536.588	49.3931
	S.E.	2.05082	119.952	4.62483
Large worker	No.	Number of particles	Time for transporting (sec)	Average time for transporting each particle (sec)
	1	34	1285	37.7941
	2	1	16	16
	3	1	24	24
	4	1	5	5
	5	1	6	6
	6	4	368	92
	7	2	194	97
	8	23	1562	67.913
	9	2	109	54.5
	10	4	230	57.5
	11	1	4	4
	12	2	32	16
	13	1	15	15
	14	1	11	11
	15	1	28	28
	16	1	39	39
	17	11	1248	113.455
	18	1	19	19
	19	1	7	7
	Mean	4.89474	273.789	37.3769
	S.E.	2.02744	114.288	7.78819

## Sheet: Fig. 6
	Frequency of each pattern of particle transport by ants, and time (mean ± SE) spent for the transport in different patterns (Fig. 6).
	Pattern
	Ad				On			Ar			ArAd			ArOn			ArAr			OnAd			OnOn			OnAr			AdAd			AdOn			AdAr
	No.	Time (sec)		No.	Time (sec)		No.	Time (sec)		No.	Time (sec)		No.	Time (sec)		No.	Time (sec)		No.	Time (sec)		No.	Time (sec)		No.	Time (sec)		No.	Time (sec)		No.	Time (sec)		No.	Time (sec)
	1	31		1	72		1	22		1	12		1	55		1	33		1	50		1	48		1	5		1	15		1	50		1	15
	2	24		2	62		2	21		2	23		2	40		2	78		2	53		2	18		2	79		2	19		2	16		2	22
	3	21		3	28		3	13		3	11		3	47		3	40		3	59		3	32		2	8		3	33		3	208		3	86
	4	15		4	55		4	18		4	69		4	17		4	8		4	93		4	32		3	10		4	35		4	42		4	25
	5	33		5	22		5	10		5	6		5	47		5	12		5	59		5	25		4	15		5	8		5	26		5	4
	6	22		6	56		6	7		6	144		6	28		6	12		6	5		6	10		5	4		6	26		6	20		6	17
	7	24		7	56		7	13		7	58		7	28		7	12		7	70		7	23		6	9		7	10		7	29		7	13
	8	24		8	47		8	9		8	23		8	17		8	12		8	6		8	8		7	4		8	40		8	8		8	20
	9	11		9	27		9	6		9	39		9	24		9	20		9	5		9	34		8	9		Mean time	23.25		Mean time	49.875		9	24
	10	12		10	37		10	8		10	22		10	44		10	13		10	8		10	8		9	10		S.E	4.2584		S.E	23.0933		10	54
	11	15		11	26		11	11		11	22		11	35		11	9		11	1		11	16		10	17								11	19
	12	14		12	27		12	8		12	24		12	39		12	22		12	13		12	8		11	19								12	13
	13	14		13	20		13	12		13	72		13	16		13	18		13	11		13	33		12	21								13	13
	14	10		14	26		14	11		14	22		14	18		14	14		14	18		14	19		13	16								14	11
	15	41		15	16		15	15		15	18		15	31		15	1		15	42		15	4		14	8								15	9
	16	38		16	23		16	10		16	50		16	32		16	9		16	29		16	5		15	30								16	20
	17	15		17	33		17	18		17	35		Mean time	32.375		17	15		17	13		17	4		16	4								17	2
	18	31		18	16		18	13		18	43		S.E	3.05624		18	21		18	7		18	14		17	10								18	3
	19	23		19	43		19	14		19	30					19	5		Mean time	30.1111		19	19		18	27								19	10
	20	22		20	18		20	10		20	8					20	13		S.E	6.53992		20	14		19	16								20	1
	21	23		21	22		21	34		Mean time	36.55					21	10					21	25		20	9								21	60
	22	90		22	31		22	34		S.E	7.08909					22	12					22	5		21	5								22	8
	23	37		23	34		23	17								23	23					23	8		22	7								23	5
	24	26		24	75		24	66								24	23					24	4		23	13								24	13
	25	42		25	33		25	41								25	38					25	100		24	25								25	9
	26	68		26	20		26	54								Mean time	18.92					26	26		25	23								26	7
	27	30		27	21		27	29								S.E	3.11069					27	45		26	4								27	20
	28	30		28	77		28	47														28	16		27	5								28	15
	29	77		29	31		29	22														29	7		28	4								29	21
	30	57		30	20		30	1														30	1		29	6								30	21
	31	77		31	34		31	3														31	10		30	24								31	19
	32	20		32	15		32	2														32	27		31	17								32	19
	33	13		33	35		33	7														Mean time	20.25		32	4								33	10
	34	35		34	39		34	12														S.E	3.3658		33	4								34	4
	35	34		35	25		35	3																	34	14								35	4
	36	5		36	31		36	26																	Mean time	13.8571								36	21
	37	20		37	20		37	43	Pattern	Ad	On	Ar	ArAd	ArOn	ArAr	OnAd	OnOn	OnAr	AdAd	AdOn	AdAr				S.E	2.30168								37	9
	38	20		38	20		38	20	Number	280	245	151	20	16	25	18	32	35	8	8	43													38	4
	39	19		39	31		39	21	Frequency	31.7821	27.8093	17.1396	2.27015	1.81612	2.83768	2.04313	3.63224	3.97276	0.908059	0.908059	4.88082													39	14
	40	26		40	31		40	18																										40	52
	41	30		41	14		41	26	Pattern	Ad	On	Ar	ArAd	ArOn	ArAr	OnAd	OnOn	OnAr	AdAd	AdOn	AdAr													41	7
	42	32		42	25		42	11	Mean time	26.4714	28.9633	21.1523	36.55	32.375	18.92	30.1111	20.25	13.8571	23.25	49.875	17.9302													42	9
	43	19		43	19		43	29	S.E.	0.978937	0.866273	1.27827	7.08909	3.05624	3.11069	6.53992	3.3658	2.30168	4.2584	23.0933	2.59106													43	39
	44	9		44	42		44	54																										Mean time	17.9302
	45	14		45	18		45	31																										S.E	2.59106
	46	35		46	45		46	49
	47	59		47	67		47	8
	48	37		48	50		48	74
	49	45		49	42		49	26
	50	56		50	23		50	17
	51	13		51	54		51	10
	52	43		52	41		52	15
	53	50		53	30		53	30
	54	25		54	18		54	46
	55	38		55	28		55	17
	56	29		56	18		56	36
	57	25		57	31		57	73
	58	35		58	41		58	25
	59	40		59	50		59	16
	60	33		60	41		60	31
	61	31		61	55		61	6
	62	38		62	20		62	8
	63	14		63	40		63	11
	64	20		64	28		64	22
	65	33		65	42		65	20
	66	34		66	41		66	14
	67	28		67	19		67	39
	68	21		68	24		68	30
	69	20		69	22		69	39
	70	27		70	40		70	43
	71	39		71	16		71	27
	72	41		72	30		72	18
	73	40		73	10		73	33
	74	13		74	26		74	10
	75	40		75	20		75	16
	76	13		76	31		76	22
	77	38		77	29		77	16
	78	8		78	25		78	10
	79	10		79	16		79	89
	80	13		80	23		80	12
	81	15		81	21		81	35
	82	16		82	29		82	34
	83	31		83	30		83	32
	84	27		84	19		84	28
	85	10		85	21		85	18
	86	11		86	71		86	39
	87	10		87	60		87	7
	88	23		88	37		88	16
	89	27		89	35		89	17
	90	17		90	22		90	36
	91	19		91	15		91	8
	92	12		92	18		92	46
	93	24		93	27		93	38
	94	10		94	20		94	25
	95	19		95	16		95	27
	96	12		96	16		96	8
	97	19		97	16		97	15
	98	29		98	35		98	43
	99	33		99	28		99	11
	100	24		100	28		100	23
	101	30		101	60		101	24
	102	56		102	36		102	16
	103	18		103	20		103	18
	104	12		104	65		104	6
	105	9		105	35		105	37
	106	27		106	23		106	79
	107	29		107	18		107	21
	108	39		108	29		108	3
	109	32		109	12		109	0
	110	31		110	38		110	6
	111	32		111	46		111	12
	112	17		112	44		112	28
	113	10		113	29		113	19
	114	25		114	17		114	5
	115	13		115	26		115	19
	116	15		116	36		116	18
	117	11		117	34		117	21
	118	26		118	19		118	26
	119	25		119	48		119	29
	120	28		120	17		120	23
	121	17		121	23		121	18
	122	6		122	31		122	12
	123	15		123	9		123	17
	124	59		124	46		124	18
	125	17		125	24		125	7
	126	14		126	17		126	12
	127	32		127	36		127	8
	128	8		128	34		128	14
	129	23		129	37		129	17
	130	37		130	17		130	11
	131	70		131	44		131	17
	132	14		132	17		132	8
	133	20		133	26		133	11
	134	36		134	18		134	6
	135	14		135	11		135	10
	136	24		136	26		136	26
	137	28		137	8		137	11
	138	31		138	22		138	20
	139	22		139	20		139	9
	140	23		140	24		140	3
	141	24		141	23		141	6
	142	63		142	19		142	8
	143	14		143	23		143	12
	144	24		144	14		144	6
	145	28		145	8		145	7
	146	30		146	12		146	22
	147	18		147	28		147	9
	148	51		148	55		148	20
	149	27		149	64		149	13
	150	21		150	36		150	17
	151	13		151	24		151	45
	152	20		152	49		Mean time	21.1523
	153	12		153	33		S.E	1.27827
	154	8		154	20
	155	17		155	22
	156	7		156	21
	157	30		157	19
	158	8		158	28
	159	53		159	22
	160	21		160	33
	161	29		161	33
	162	19		162	24
	163	10		163	22
	164	41		164	22
	165	18		165	31
	166	23		166	23
	167	18		167	13
	168	73		168	23
	169	72		169	38
	170	112		170	31
	171	35		171	33
	172	12		172	34
	173	38		173	17
	174	11		174	32
	175	23		175	35
	176	10		176	14
	177	15		177	51
	178	7		178	35
	179	8		179	15
	180	30		180	36
	181	77		181	25
	182	10		182	30
	183	17		183	21
	184	32		184	22
	185	22		185	22
	186	46		186	18
	187	39		187	22
	188	27		188	35
	189	23		189	27
	190	59		190	25
	191	30		191	35
	192	100		192	17
	193	17		193	23
	194	35		194	15
	195	37		195	30
	196	18		196	72
	197	40		197	31
	198	24		198	22
	199	28		199	22
	200	19		200	35
	201	18		201	28
	202	19		202	41
	203	8		203	25
	204	19		204	39
	205	16		205	28
	206	10		206	23
	207	8		207	14
	208	25		208	44
	209	24		209	21
	210	38		210	32
	211	42		211	44
	212	26		212	16
	213	16		213	20
	214	78		214	17
	215	20		215	21
	216	31		216	15
	217	30		217	19
	218	36		218	17
	219	12		219	12
	220	13		220	29
	221	15		221	33
	222	8		222	12
	223	33		223	49
	224	38		224	69
	225	17		225	21
	226	31		226	23
	227	19		227	26
	228	12		228	18
	229	14		229	20
	230	33		230	27
	231	32		231	34
	232	9		232	16
	233	52		233	16
	234	23		234	23
	235	23		235	23
	236	31		236	13
	237	34		237	15
	238	61		238	32
	239	19		239	11
	240	12		240	14
	241	21		241	37
	242	13		242	27
	243	14		243	14
	244	17		244	21
	245	23		245	18
	246	29		Mean time	28.9633
	247	21		S.E	0.866273
	248	13
	249	21
	250	12
	251	20
	252	19
	253	15
	254	11
	255	43
	256	32
	257	24
	258	28
	259	26
	260	27
	261	52
	262	14
	263	19
	264	19
	265	17
	266	11
	267	14
	268	12
	269	14
	270	12
	271	9
	272	16
	273	39
	274	19
	275	51
	276	11
	277	24
	278	33
	279	21
	280	18
	Mean time	26.4714
	S.E	0.978937
